# Supplementary material for: LNA units present in [RP-PS]-(DNA#LNA) chimeras enhance the thermal stability of parallel duplexes and triplexes formed with (2′-OMe)-RNA strands
Source: Royal Society of Chemistry journal article supplement (doi:10.1039/d0ra03934a), 2020-01-01

## Supporting Information

# LNA Units Present in [*R<sub>p</sub>*-PS]-(DNA#LNA) Chimeras Enhance the Thermal Stability of Parallel Duplexes and Triplexes Formed with (2'-OMe)-RNA Strands.

Katarzyna Jastrzębska, Barbara Mikołajczyk and Piotr Guga,

Centre of Molecular and Macromolecular Studies, Polish Academy of Sciences,  
Sienkiewicza 112, 90-363 Łódź, Poland.

## Table of Content

|                                                                                                                                                                      |    |
|----------------------------------------------------------------------------------------------------------------------------------------------------------------------|----|
| Figure S1. A MALDI-TOF MS spectrum recorded for <b>RA2</b> [ <i>R<sub>p</sub></i> -PS]-d(GGAGA <sub>L</sub> AAGA <sub>L</sub> GAG) .....                             | 2  |
| Figure S2. A MALDI-TOF MS spectrum recorded for <b>RA4</b> [ <i>R<sub>p</sub></i> -PS]-d(GGA <sub>L</sub> GA <sub>L</sub> AAGA <sub>L</sub> GAG).....                | 3  |
| Figure S3. A MALDI-TOF MS spectrum recorded for <b>rG2</b> [ <i>R<sub>p</sub></i> -PS]-d(GGAG <sub>L</sub> AAAG <sub>L</sub> AGAG) .....                             | 4  |
| Figure S4. A MALDI-TOF MS spectrum recorded for <b>rG4</b> [ <i>R<sub>p</sub></i> -PS]-d(GG <sub>L</sub> AG <sub>L</sub> AAAG <sub>L</sub> AG <sub>L</sub> AG).....  | 5  |
| Figure S5. A MALDI-TOF MS spectrum recorded for <b>sG4</b> [ <i>S<sub>p</sub></i> -PS]-d(GG <sub>L</sub> AG <sub>L</sub> AAAG <sub>L</sub> AG <sub>L</sub> AG) ..... | 6  |
| Figure S6. Normalized melting profiles recorded for the complexes formed by G4 with wR12 or hR12 in 7.2 buffer.....                                                  | 7  |
| Figure S7. CD spectra recorded for complexes formed by <b>rB0</b> with 12 nt <sup>m</sup> RNAs in pH 7.2 buffer.....                                                 | 8  |
| Figure S8. Chromatogram from RP-HPLC (DMT-off) purification of the <b>RA2</b> oligomer .....                                                                         | 9  |
| Figure S9. Chromatogram from RP-HPLC (DMT-off) purification of the <b>RA4</b> oligomer.....                                                                          | 10 |
| Figure S10. Chromatogram from RP-HPLC (DMT-off) purification of the <b>rG2</b> oligomer. ....                                                                        | 11 |
| Figure S11. Chromatogram from RP-HPLC (DMT-off) purification of the <b>rG4</b> oligomer. ....                                                                        | 12 |
| Figure S12. Chromatogram from RP-HPLC (DMT-off) purification of the <b>sG4</b> oligomer.....                                                                         | 13 |

Figure S1. A MALDI-TOF MS spectrum recorded for **RA2** [ $R_p$ -PS]-d(GGAGA<sub>L</sub>AAGA<sub>L</sub>GAG)  
 $m/z$  calc. 4025, found 4019.5

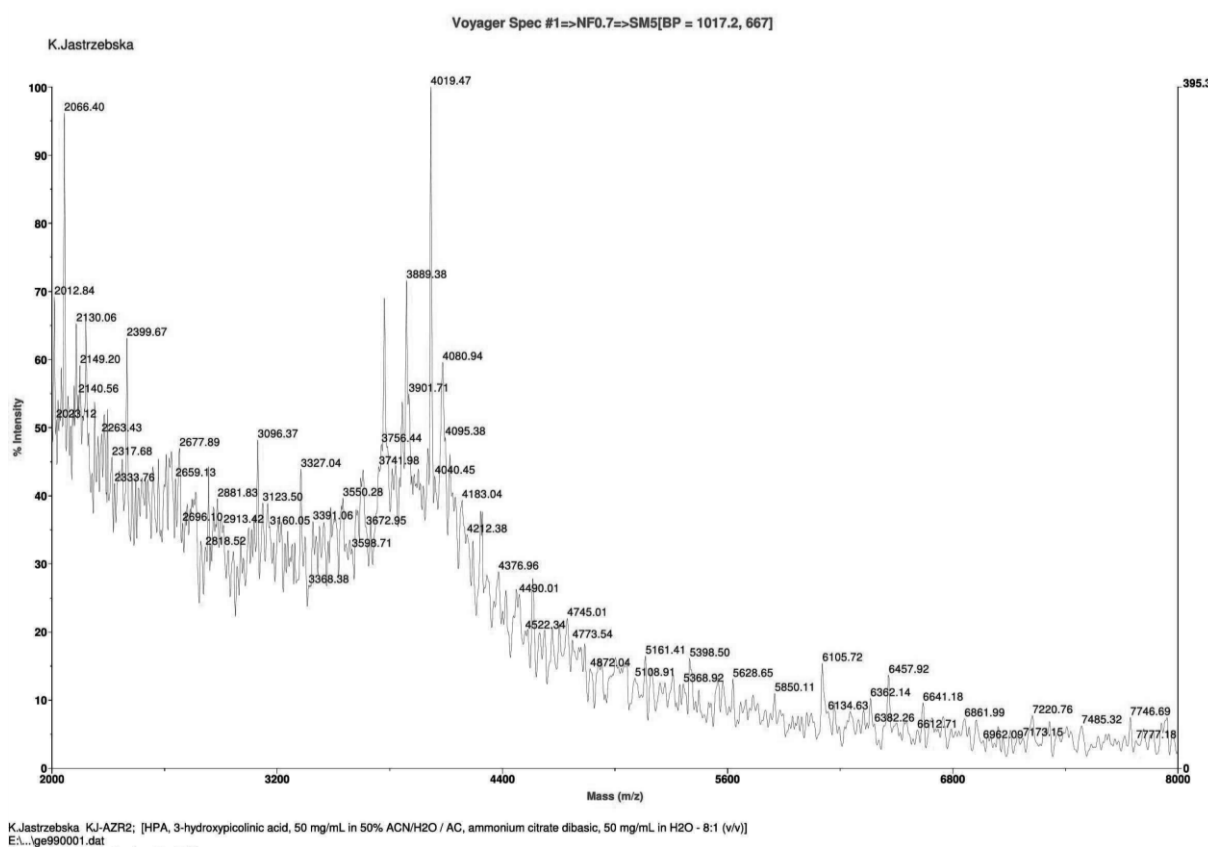

Figure S2. A MALDI-TOF MS spectrum recorded for **RA4** [*R*<sub>p</sub>-PS]-d(GGA<sub>L</sub>GA<sub>L</sub>AAGA<sub>L</sub>GAG)  
*m/z* calc.4081, found 4075.1

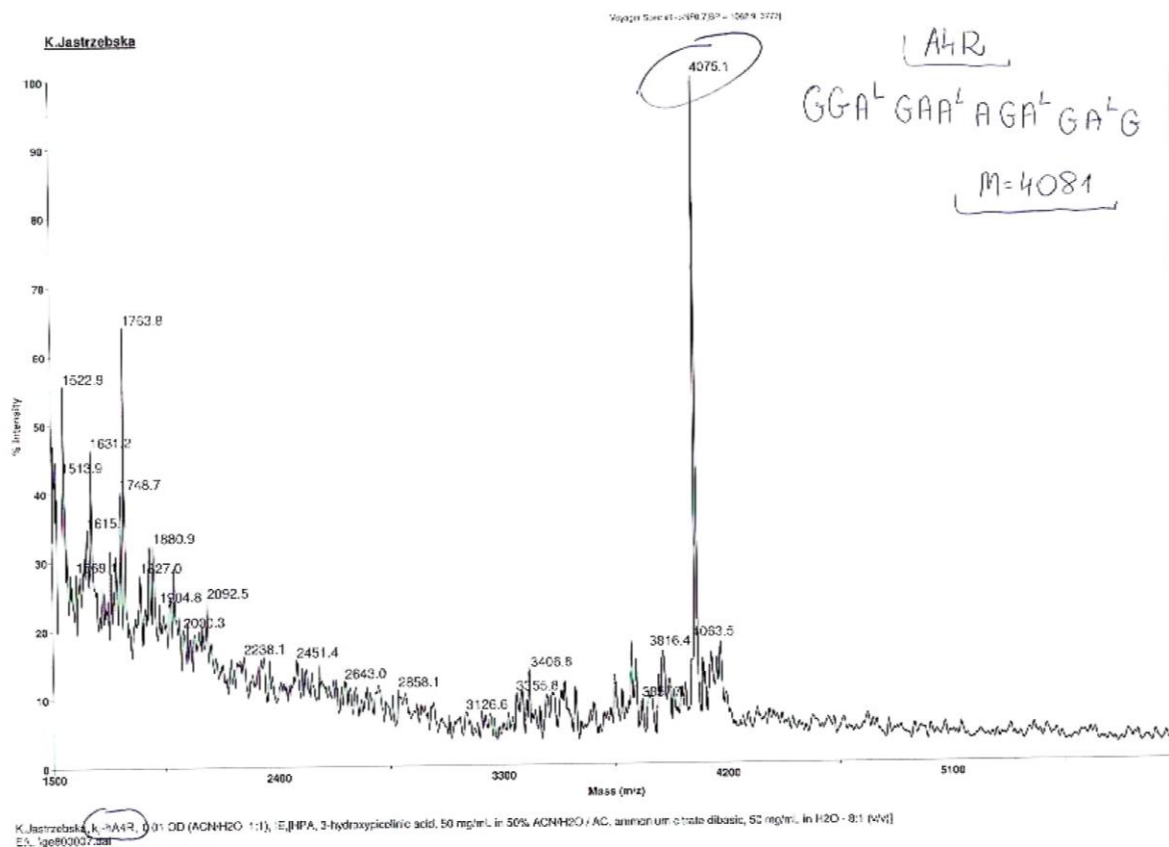

Figure S3. A MALDI-TOF MS spectrum recorded for **rG2** [*R*<sub>P</sub>-PS]-d(GGAG<sub>L</sub>AAAG<sub>L</sub>AGAG)  
*m/z* calc.4025, found 4019.3

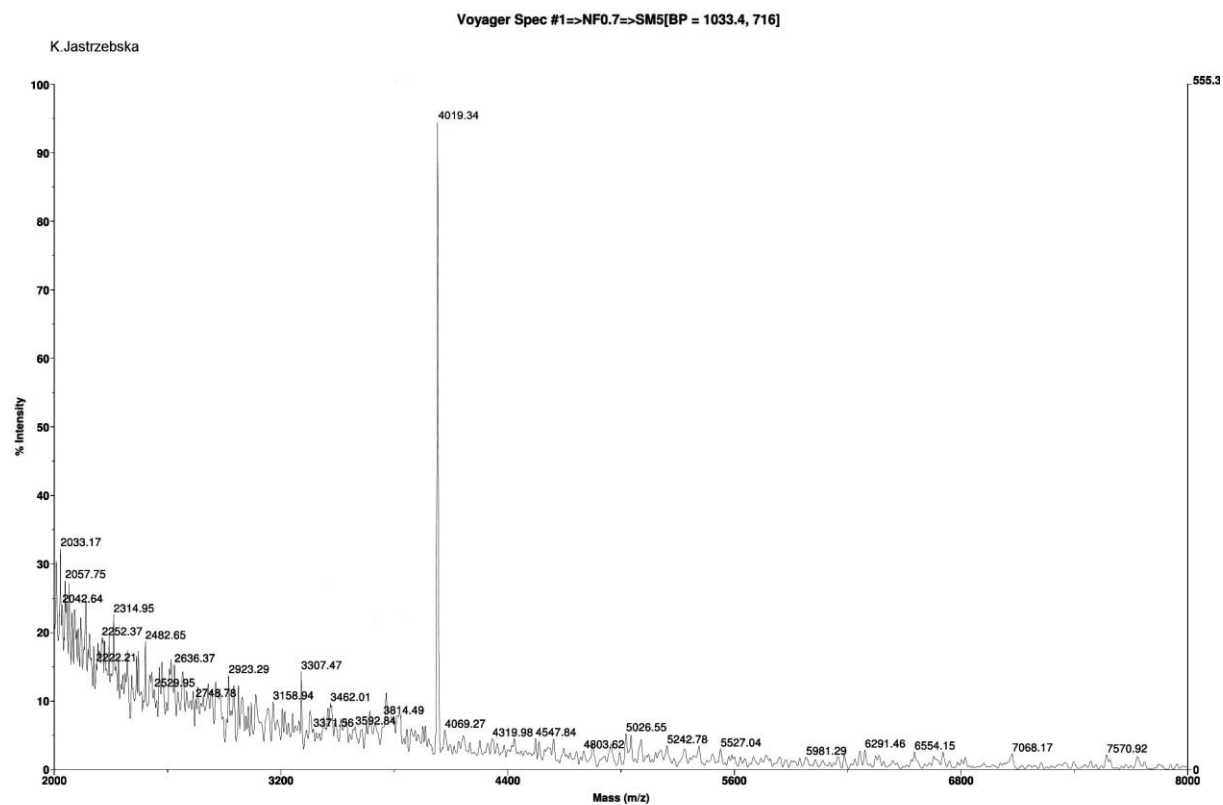

K.Jastrzebska KJ-GZR2: [HPA, 3-hydroxypicolinic acid, 50 mg/mL in 50% ACN/H<sub>2</sub>O / AC, ammonium citrate dibasic, 50 mg/mL in H<sub>2</sub>O - 8:1 (v/v)]  
E:\...lf010005.dat

Figure S4. A MALDI-TOF MS spectrum recorded for **rG4** [*R*<sub>P</sub>-PS]-d(GG<sub>L</sub>AG<sub>L</sub>AAAG<sub>L</sub>AG<sub>L</sub>AG)  
*m/z* calc.4081, found 4075.5

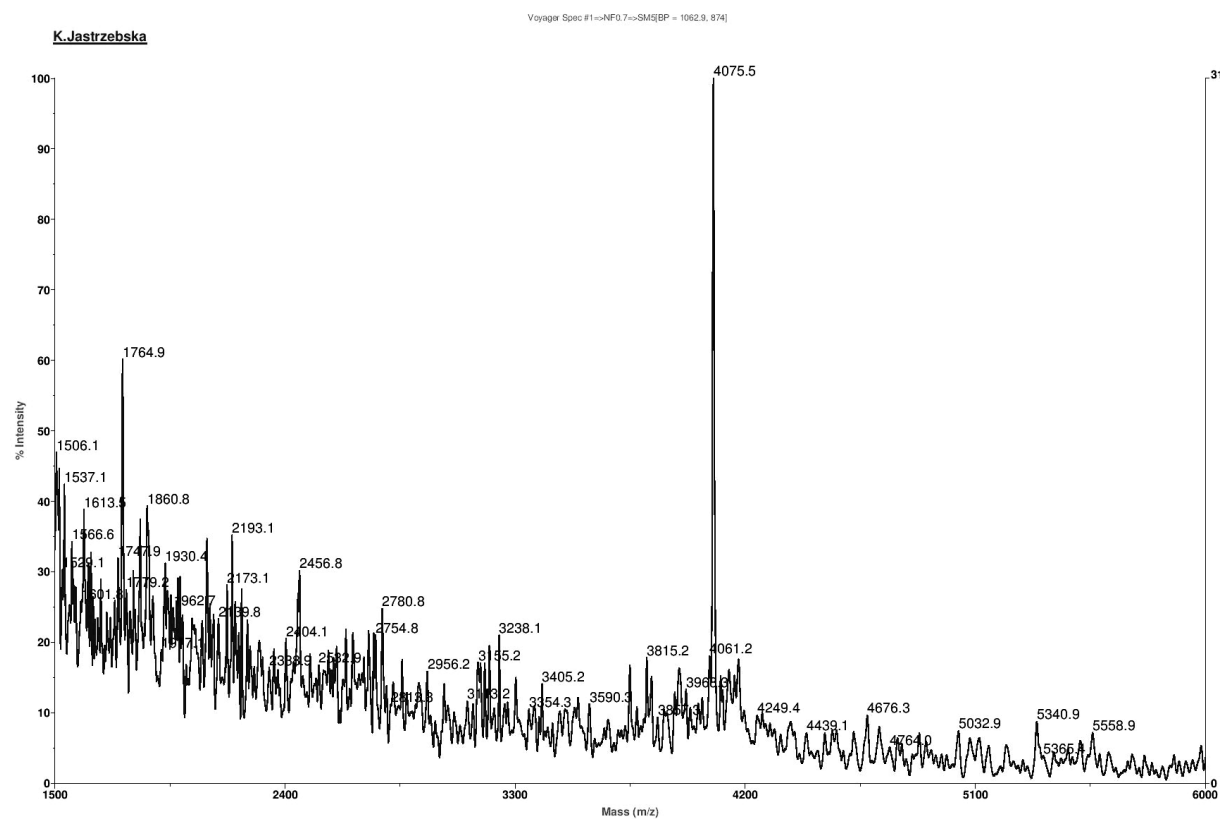

K.Jastrzebska, KJ-G4R1, 0.01 OD (ACN/H2O 1:1), IE,[HPA, 3-hydroxypicolinic acid, 50 mg/mL in 50% ACN/H2O / AC, ammonium citrate dibasic, 50 mg/mL in H2O - 8:1 (v/v)]  
E:\...ge790004.dat

Figure S5. A MALDI-TOF MS spectrum recorded for **sg4** [S<sub>P</sub>-PS]-d(GG<sub>L</sub>AG<sub>L</sub>AAAG<sub>L</sub>AG<sub>L</sub>AG)  
*m/z* calc.4081, found 4078.2

KJ-G4S Jastrzebska K ; linear neg.  
Matrix: HPA 50 mg/mL H<sub>2</sub>O/ACN 1:1 v/v, AC 50 mg/mL H<sub>2</sub>O/ACN 1:1 v/v; HPA/AC 8:1  
Data: gh350001.G11[c] 9 Mar 2016 10:33 Cal: T6\_T12\_26\_09\_12 26 Sep 2012 13:32  
Shimadzu Biotech Axima Performance 2.9.1.20100121; Mode Linear\_neg Power: 114, Blanked, P.Ext. @ 4000 (bin 90)  
%Int. 6.5 mV[sum= 1300 mV] Profiles 1-200 Smooth Av 25 -Baseline 1000

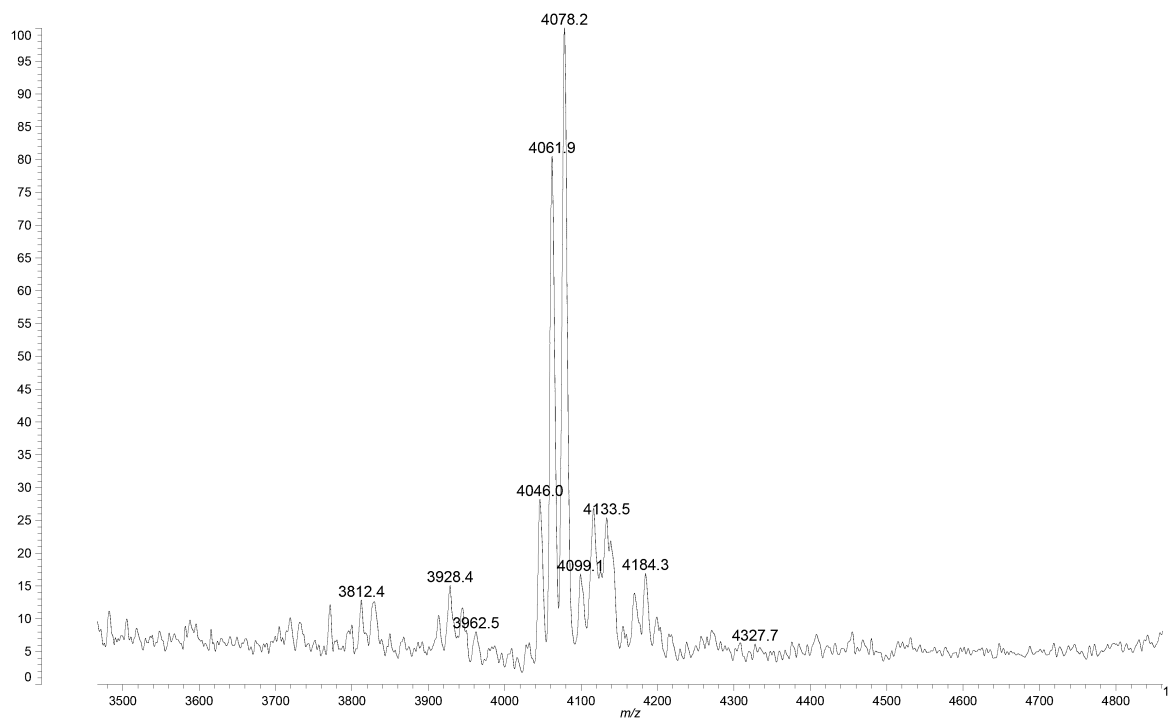

Figure S6. Normalized melting profiles recorded for the complexes formed by G4 with wR12 or hR12 in 7.2 buffer.

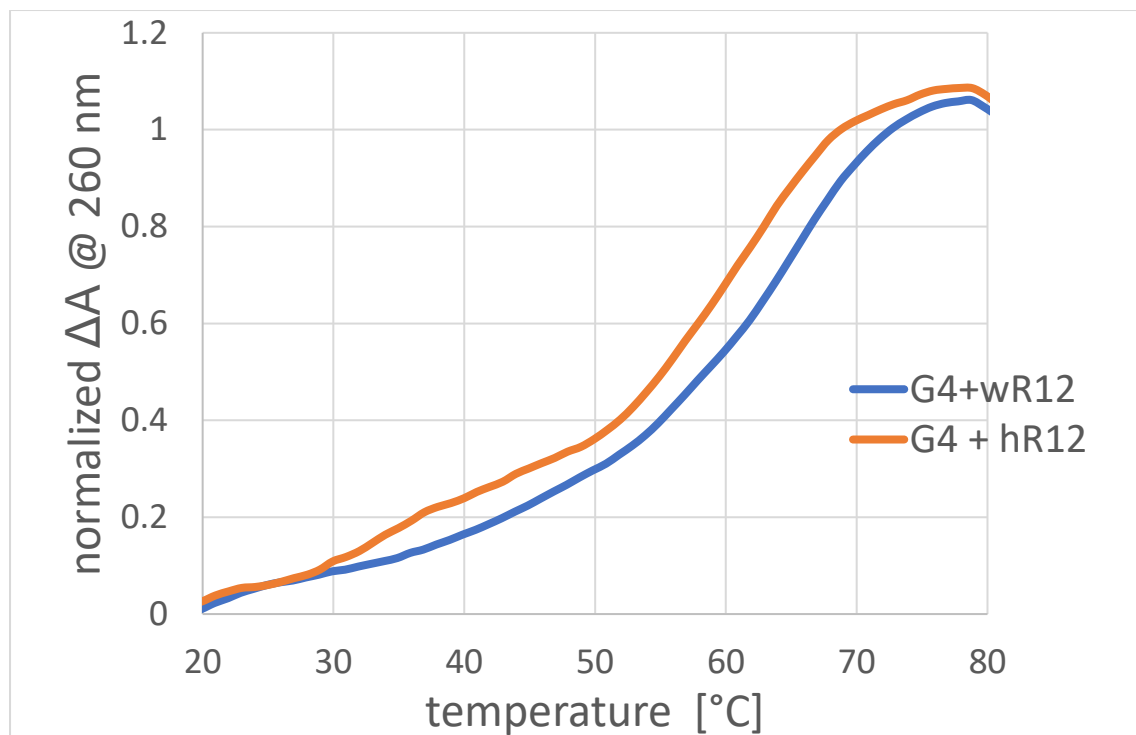

Figure S7. CD spectra recorded for complexes formed by **rB0** with 12 nt mRNAs in pH 7.2 buffer

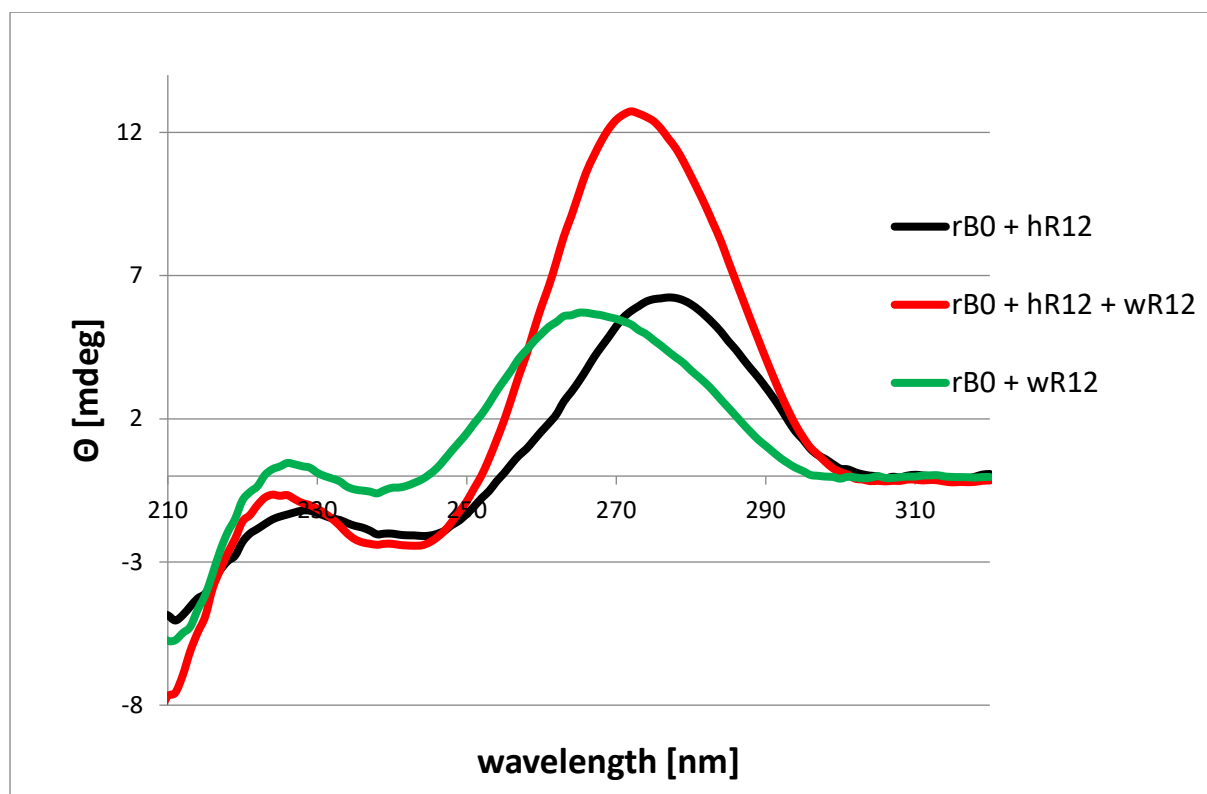



Figure S8. Chromatogram from RP-HPLC (DMT-off) purification of the **rA2** oligomer

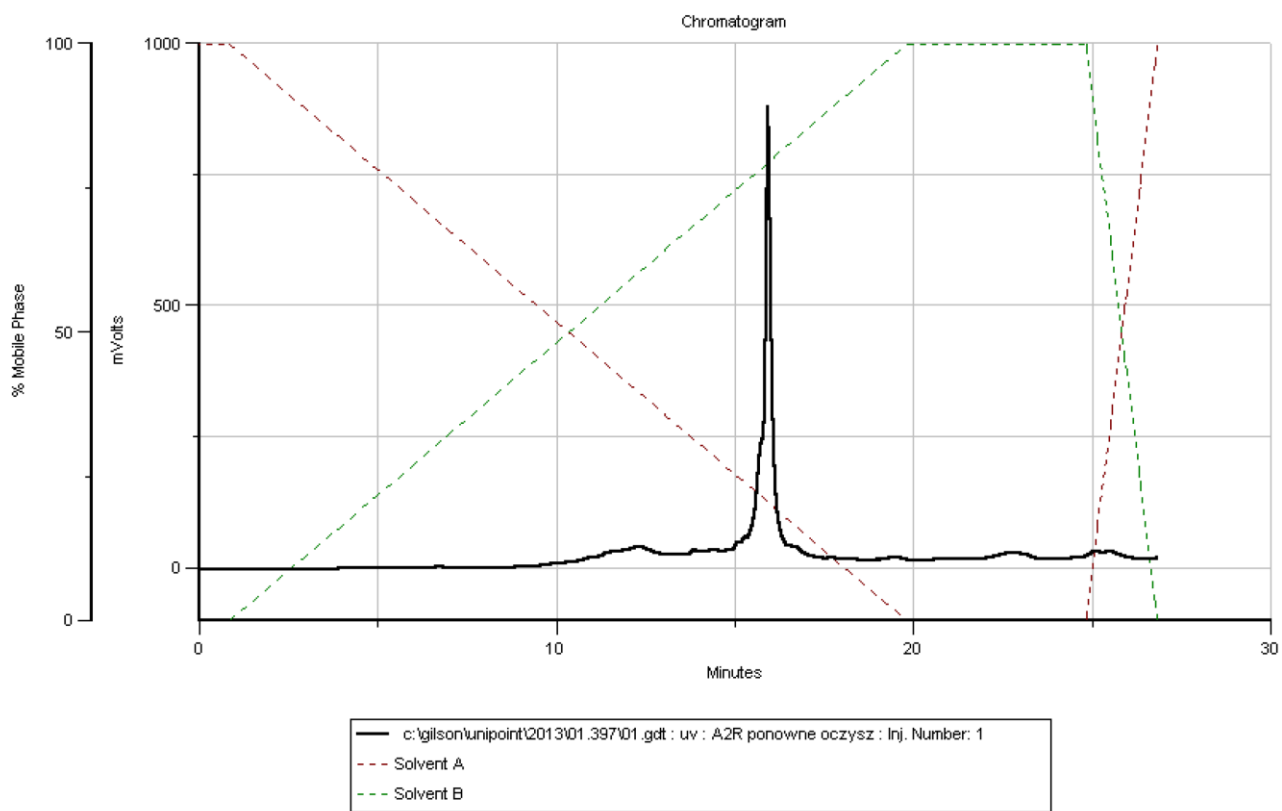

Figure S9. Chromatogram from RP-HPLC (DMT-off) purification of the **rA4** oligomer.

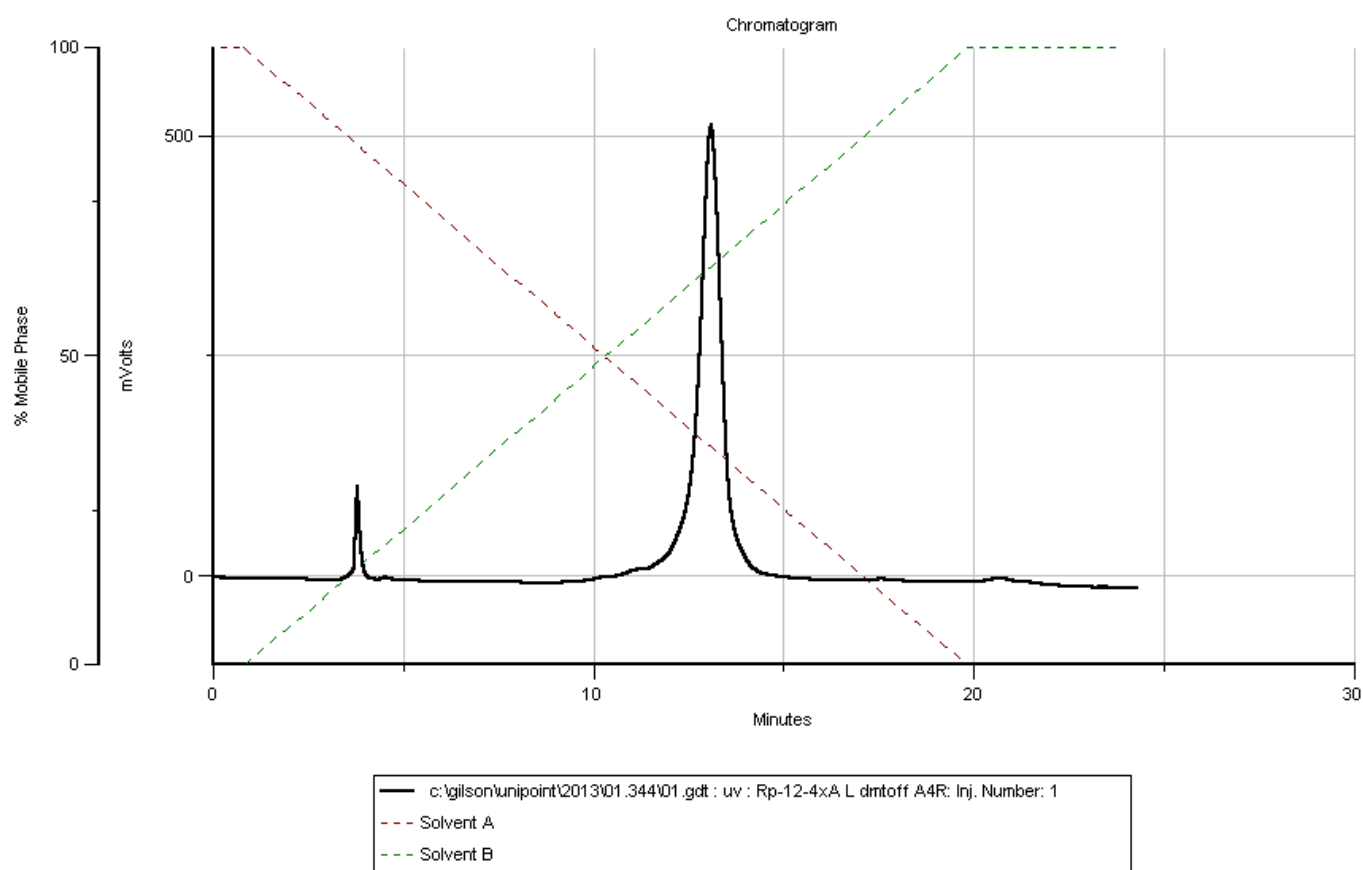

Figure S10. Chromatogram from RP-HPLC (DMT-off) purification of the **rG2** oligomer.

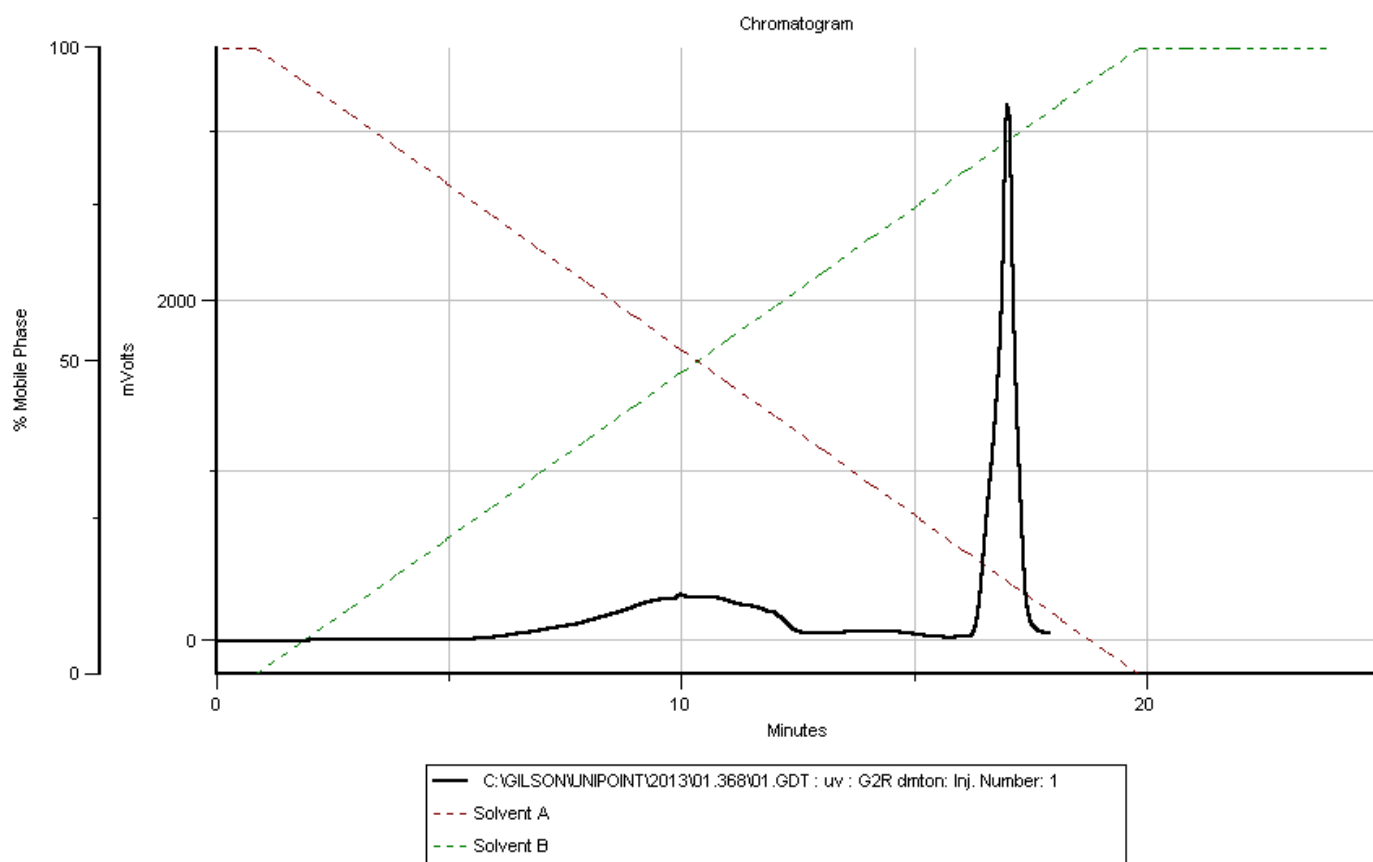

Figure S11. Chromatogram from RP-HPLC (DMT-off) purification of the **rG4** oligomer.

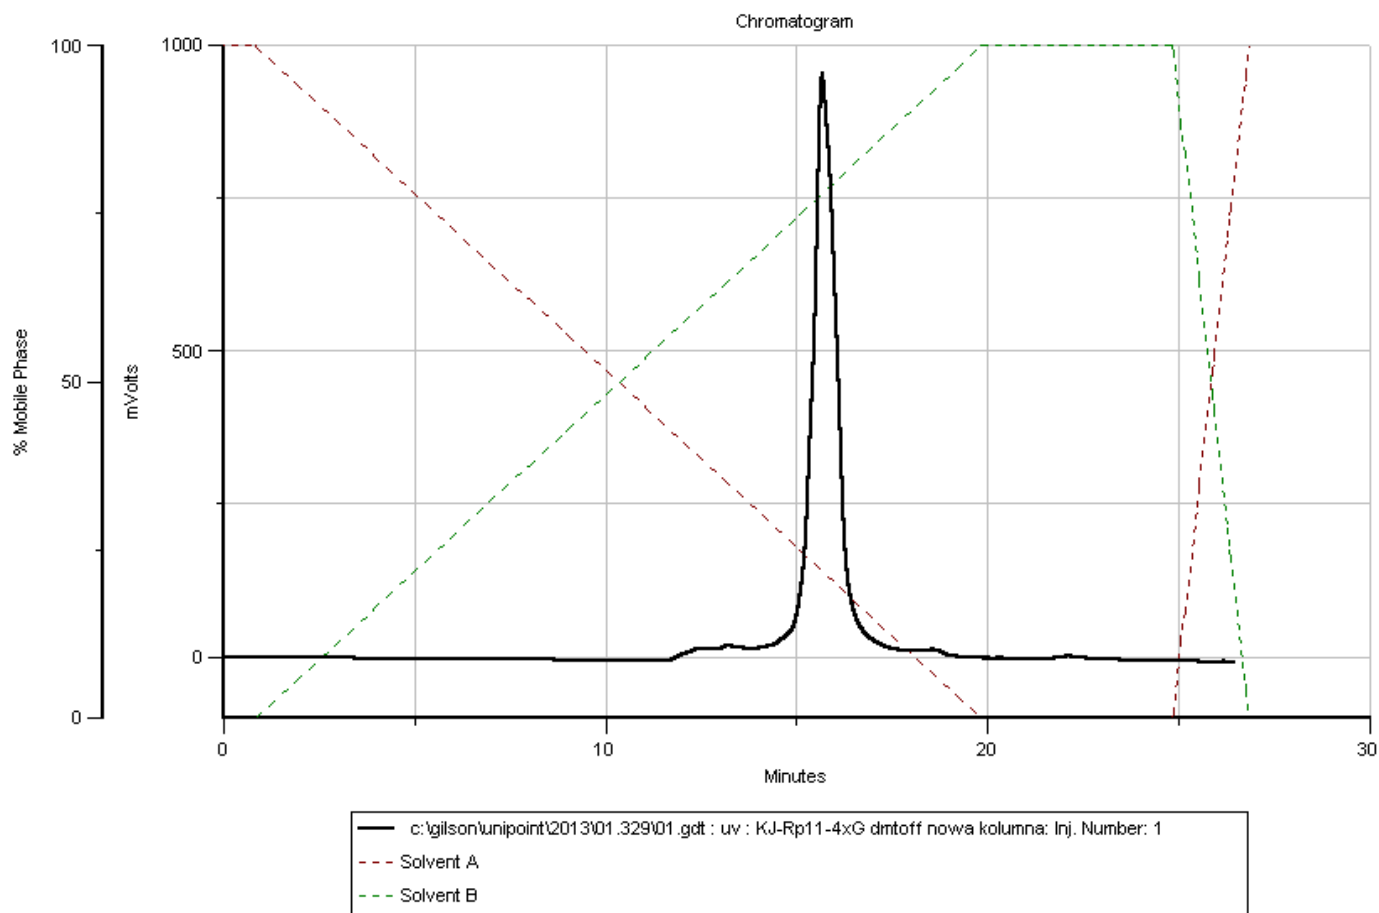

Figure S12. Chromatogram from RP-HPLC (DMT-off) purification of the **sG4** oligomer.

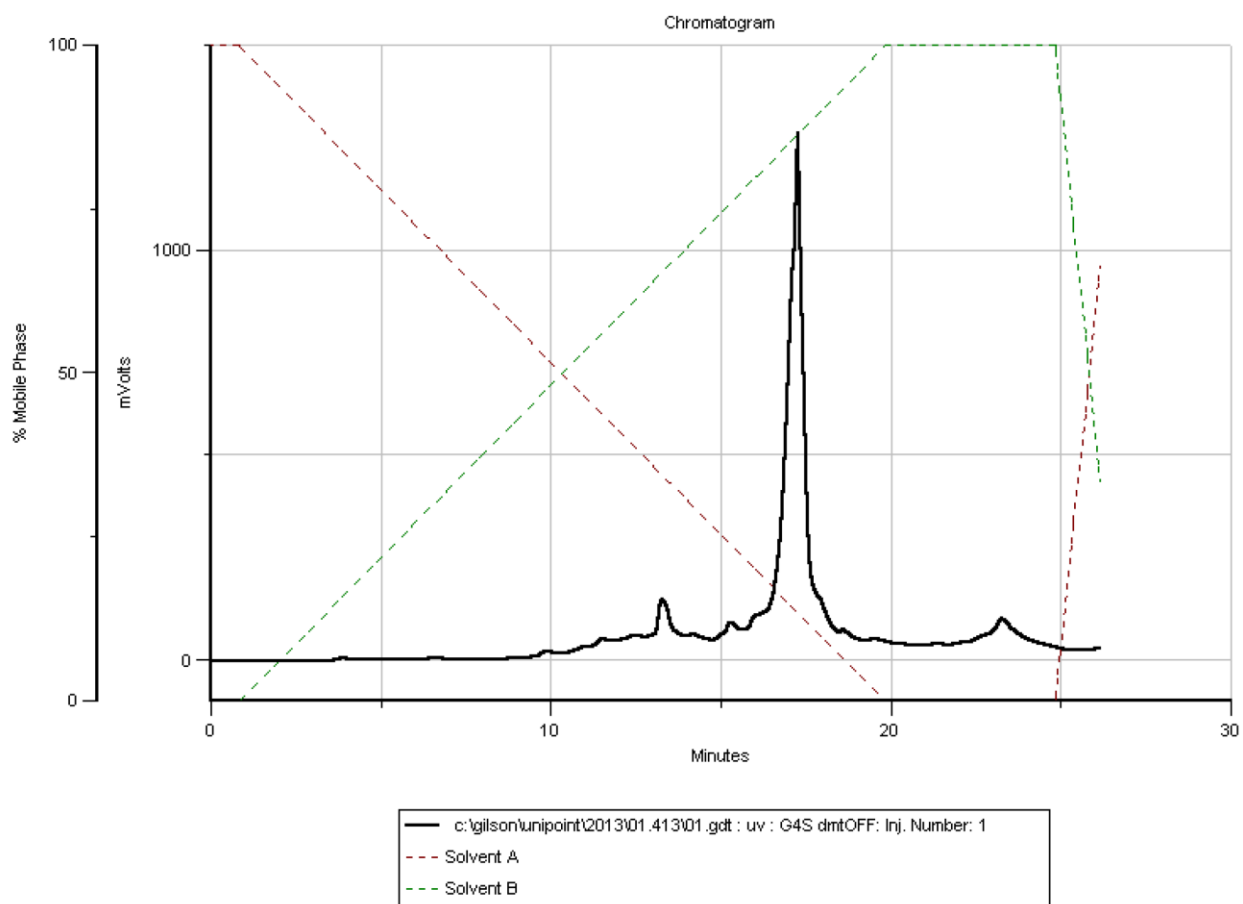

Supplement: d0ra03934a1.pdf [file d0ra03934a1.pdf]
